# Supplementary material for: Repurposing Hazelnut Waste Products for a Sustainable Economy: A Metabolomic Analysis of Cuticles and Shells to Highlight Their Antioxidant Potential and Inhibitory Activity against Verocytotoxic Escherichia coli
Source: MDPI journal article supplement (doi:10.3390/su15043268), 2023-02-10
Supplement: s1 [file s1]

**Supplementary Table S1.** Antioxidant activity of cuticles and shells extracts. The table report the value of percentage of inhibition of radical scavenging activity of cuticles and shells of hazelnut at different dilution and extracted with two different methods: 1) Water/Acetone (40/60); 2) Water/Ethanol (50/50). Data are shown as mean (n=6) and standard error.

| Extracts | Dilution | Extraction method         |                           |
|----------|----------|---------------------------|---------------------------|
|          |          | Water/Acetone (40/60)     | Water/Ethanol (50/50)     |
| Cuticles | 1:16     | 91,39 ± 0,42 <sup>a</sup> | 90,93 ± 0,50 <sup>a</sup> |
|          | 1:32     | 84,85 ± 1,23 <sup>a</sup> | 74,01 ± 1,06 <sup>b</sup> |
|          | 1:64     | 63,08 ± 1,13 <sup>a</sup> | 55,06 ± 1,08 <sup>b</sup> |
|          | 1:100    | 46,72 ± 1,55 <sup>a</sup> | 40,34 ± 1,19 <sup>b</sup> |
| Shells   | As is    | 92,09 ± 1,56 <sup>a</sup> | 90,25 ± 1,59 <sup>a</sup> |
|          | 1:2      | 85,13 ± 0,90 <sup>a</sup> | 73,37 ± 1,84 <sup>b</sup> |
|          | 1:4      | 61,63 ± 0,88 <sup>a</sup> | 55,18 ± 0,78 <sup>b</sup> |
|          | 1:8      | 29,72 ± 0,93 <sup>a</sup> | 23,11 ± 1,15 <sup>b</sup> |
